# Supplementary material for: Sar1 Interacts with Sec23/Sec24 and Sec13/Sec31 Complexes: Insight into Its Involvement in the Assembly of Coat Protein Complex II in the Microsporidian Nosema bombycis
Source: PubMed Central journal article supplement (PMC9769691; doi:10.1128/spectrum.00719-22), 2022-10-27
Supplement: spectrum.00719-22-s0001.pdf [file spectrum.00719-22-s0001.pdf]

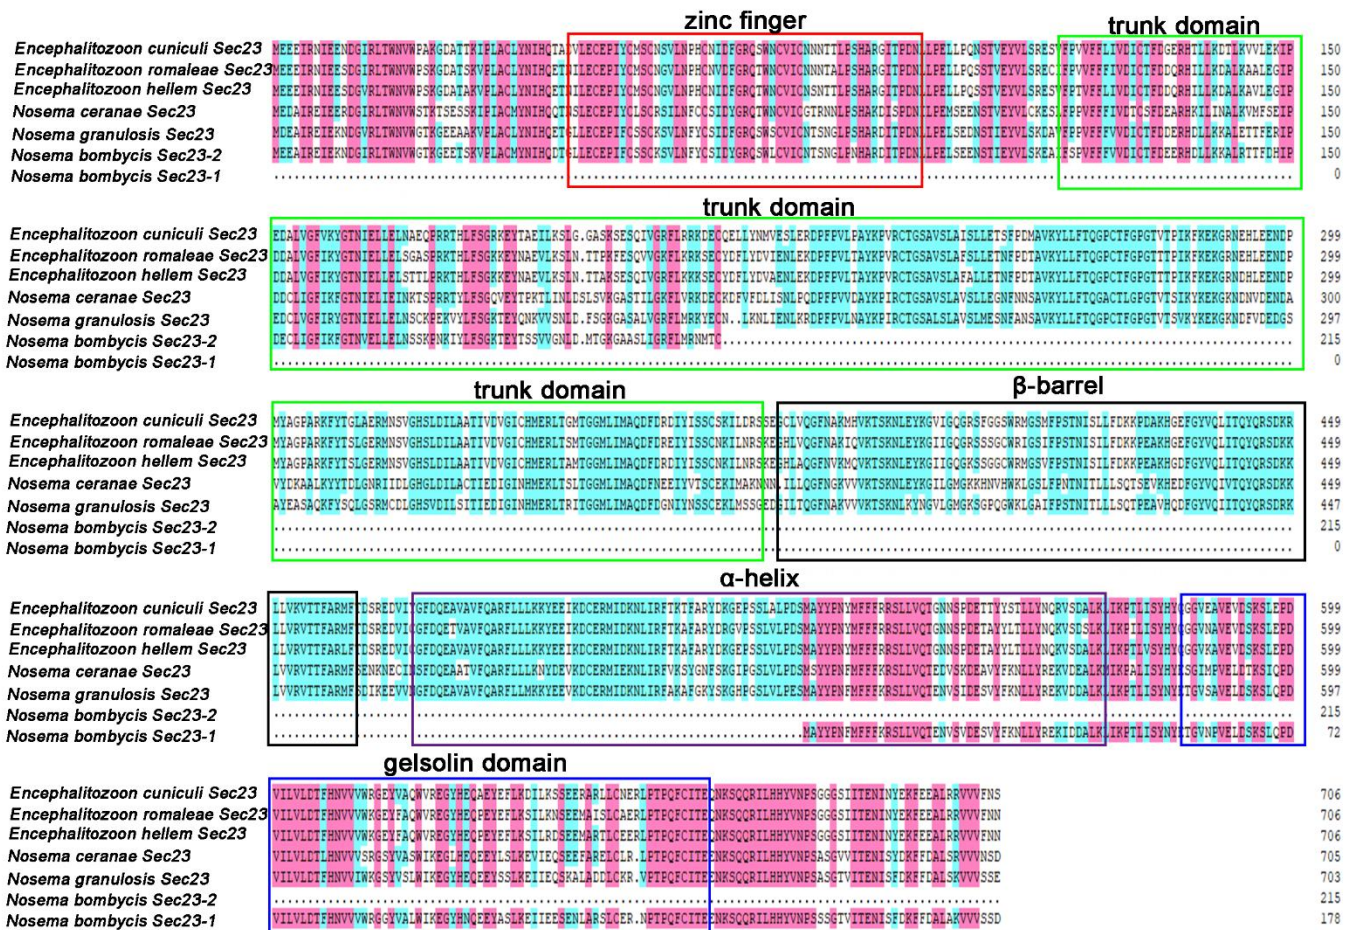

**Fig. S1** Amino acid alignment of Sec23 from microsporidian species. The red box showed the zinc finger, the green box showed the trunk domain, the black box showed the β-barrel, the purple box showed the α-helix, the blue box showed the gelsolin domain.
